# Supplementary material for: TP53 co-mutations in EGFR mutated patients in NSCLC stage IV: A strong predictive factor of ORR, PFS and OS in EGFR mt+ NSCLC
Source: PubMed Central journal article supplement (PMC6980625; doi:10.18632/oncotarget.27430), 2020-01-21
Supplement: oncotarget-11-250-s001.pdf [file oncotarget-11-250-s001.pdf]

## TP53 co-mutations in EGFR mutated patients in NSCLC stage IV: A strong predictive factor of ORR, PFS and OS in EGFR mt+ NSCLC

### SUPPLEMENTARY MATERIALS

#### PATIENTS AND METHODS

Microtome sections (5  $\mu$ M) were prepared from FFPE-tissue of NSCLC samples and one object slide was HE stained for tumor evaluation by a pathologist. Tumor tissue was gained from the remaining slides by manual microdissection, or in case material was limited, enriched by Laser Capture Microdissection (Leica CTR6500). DNA extraction was performed either manually (Macharey Nagel) or semi-automated (Maxwell MDx, Promega). Against the background of technological advances in recent years, EGFR exon 18–21 and TP53 (exons 5–9) mutational analysis were performed by direct Sanger sequencing, Cobas<sup>®</sup> test or NGS-based methods. Alternatively, an amplicon-based NGS panel (Illumina platform) was used to detect mutations in 17 relevant genes, including TP53. Part of the samples were analyzed with a hybrid capture based target enrichment followed by massively parallel sequencing (Hybrid Capture NGS, NeoSelect, NEO New Oncology). The library preparation for the samples was performed using the Agilent SureSelect XT Kit as per the manufacturers' recommendations.

In an effort to specify the functional significance of the respective mutations in further detail, we included additional parameters in order to modify differentiation into pathogenic vs. non-pathogenic TP53 mutations. These mutations are likely to interfere with TP53 function significantly. Also, if an Align-GVGD score of C65 was reached, mutations were classified as pathogenic. Specifically, DNA-contact-mutations R273C, R273G, R248Q were reclassified as pathogenic mutations, since functional impairment is likely [2]. Mutation R280I is located within the LSH2- (loop-sheet-helix region 2), which is part of the DNA-binding core and was therefore re-categorized as pathogenic. Mutations H179R and

C176S constitute Zn<sup>2+</sup>-binding sites and were therefore also regarded as pathogenic upon review. In addition, online protein prediction programs were used to estimate the pathogenicity of all other p53 missense changes located inside the key DNA-binding domain of p53 L1 (codons 112–141), L2 (codons 163–195), L3 (codons 236–251), LSH1 (119–135) and LSH2 (272–287).

A third classification was recently proposed by the group of Canale et al. [3]. The authors characterized a cohort of EGFR mt+ patients that in 30.1% of cases carried additional TP53 mutations and these were categorized based on exons. TP53 mutations within exon 8 were associated with significantly lower DCR, and shorter PFS and overall survival [3].

#### REFERENCES

1. Poeta ML, Manola J, Goldwasser MA, Forastiere A, Benoit N, Califano JA, Ridge JA, Goodwin J, Kenady D, Saunders J, Westra W, Sidransky D, Koch WM. TP53 mutations and survival in squamous-cell carcinoma of the head and neck. *N Engl J Med.* 2007; 357:2552–61. <https://doi.org/10.1056/NEJMoa073770>. [PubMed]
2. Joerger AC, Fersht AR. Structure-function-rescue: the diverse nature of common p53 cancer mutants. *Oncogene.* 2007; 26:2226–42. <https://doi.org/10.1038/sj.onc.1210291>. [PubMed]
3. Canale M, Petracci E, Delmonte A, Chiadini E, Dazzi C, Papi M, Capelli L, Casanova C, De Luigi N, Mariotti M, Gamboni A, Chiari R, Bennati C, et al. Impact of TP53 mutations on outcome in EGFR-mutated patients treated with first-line Tyrosine Kinase Inhibitors. *Clin Cancer Res.* 2017; 23:2195–2202. <https://doi.org/10.1158/1078-0432.CCR-16-0966>. [PubMed]

**Supplementary Table 1: Baseline characteristics of patients with EGFR mutations (n = 75)**

|                                                | Exon 19<br>n = 42 | Exon 21<br>n = 27 | Exon 18/20 (I/III)<br>n = 6 | p-value | All<br>n = 75 |
|------------------------------------------------|-------------------|-------------------|-----------------------------|---------|---------------|
| Age (years)                                    |                   |                   |                             |         |               |
| mean                                           | 63.6 (45–85)      | 66.5 (45–81)      | 72 (60–85)                  | 0.08    | 65.4 (45–85)  |
| median                                         | 64                | 70                | 74                          | 0.06    | 66            |
| Sex                                            |                   |                   |                             |         |               |
| men                                            | 15 (35.7%)        | 8 (29.6%)         | 0                           | 0.20    | 23 (30.7%)    |
| women                                          | 27 (64.3%)        | 19 (70.4%)        | 6 (100%)                    |         | 52 (69.3%)    |
| in total                                       | 42 (100%)         | 27 (100%)         | 6 (100%)                    |         | 75 (100%)     |
| Smoking status                                 |                   |                   |                             | 0.21    |               |
| never/light                                    | 26 (62%)          | 22 (81.5%)        | 3 (50%)                     |         | 51 (68%)      |
| ex/current                                     | 13 (31%)          | 5 (18.5%)         | 3 (50%)                     |         | 21 (36%)      |
| not known                                      | 3 (7%)            | 0                 | 0                           |         | 3 (4%)        |
| in total                                       | 42 (100%)         | 27 (100%)         | 6 (100%)                    |         | 75 (100%)     |
| ECOG                                           |                   |                   |                             | 0.01    |               |
| 0                                              | 24 (57.1%)        | 16 (59.3%)        | 3 (50%)                     |         | 43 (57.3%)    |
| 1                                              | 16 (38.1%)        | 7 (25.9%)         | 0                           |         | 23 (30.7%)    |
| 2                                              | 2 (4.8%)          | 3 (11.1%)         | 3 (50%)                     |         | 8 (10.7%)     |
| 3                                              | 0                 | 1 (3.7%)          | 0                           |         | 1 (1.3%)      |
| in total                                       | 42 (100%)         | 27 (100%)         | 6 (100%)                    |         | 75 (100%)     |
| CCI                                            |                   |                   |                             | 0.13    |               |
| 0–1                                            | 12 (28.6%)        | 5 (18.5%)         | 0                           |         | 17 (22.7%)    |
| 2–3                                            | 20 (47.6%)        | 16 (59.3%)        | 2 (33.3%)                   |         | 38 (50.6%)    |
| >3                                             | 10 (23.8%)        | 6 (22.2%)         | 4 (67.7%)                   |         | 20 (26.6%)    |
| in total                                       | 42 (100%)         | 27 (100%)         | 6 (100%)                    |         | 75 (100%)     |
| CNS metastasis                                 |                   |                   |                             |         |               |
| CNS primary                                    |                   |                   |                             | 0.55    |               |
| • yes                                          | 8 (19%)           | 8 (29.6%)         | 1 (16.7%)                   |         | 17 (22.7%)    |
| • no                                           | 34 (81%)          | 19 (70.4%)        | 5 (83.3%)                   |         | 58 (77.3%)    |
| in total                                       | 42 (100%)         | 27 (100%)         | 6 (100%)                    |         | 75 (100%)     |
| CNS PD                                         |                   |                   |                             | 0.38    |               |
| • yes                                          | 12 (28.6%)        | 4 (14.8%)         | 1 (16.7%)                   |         | 17 (22.7%)    |
| • no                                           | 30 (71.4%)        | 23 (85.2%)        | 5 (83.3%)                   |         | 58 (77.3%)    |
| in total                                       | 42 (100%)         | 27 (100%)         | 6 (100%)                    |         | 75 (100%)     |
| TP53 mutation classifications                  |                   |                   |                             |         |               |
| Poeta et al. [1]                               |                   |                   |                             | 0.94    |               |
| - non-disruptive                               | 9 (21.4%)         | 4 (14.8%)         | 0                           |         | 13 (17.4%)    |
| - disruptive                                   | 8 (19.1%)         | 6 (22.2%)         | 2 (33.3%)                   |         | 16 (21.3%)    |
| - WT                                           | 16 (38.1%)        | 12 (44.5%)        | 2 (33.3%)                   |         | 30 (40%)      |
| - not done                                     | 9 (21.4%)         | 5 (18.5%)         | 2 (33.4%)                   |         | 16 (21.3%)    |
| - in total                                     | 42 (100%)         | 27 (100%)         | 6 (100%)                    |         | 75 (100%)     |
| TP53 Structural/<br>biophysical classification |                   |                   |                             | 0.95    |               |
| - non-pathogenic                               | 4 (9.5%)          | 2 (7.4%)          | 1 (16.7%)                   |         | 7 (9.4%)      |
| - pathogenic                                   | 13 (31%)          | 8 (29.6%)         | 1 (16.7%)                   |         | 22 (29.3%)    |
| - WT                                           | 16 (38.1%)        | 12 (44.5%)        | 2 (33.3%)                   |         | 30 (40%)      |
| - not done                                     | 9 (21.4%)         | 5 (18.5%)         | 2 (33.3%)                   |         | 16 (21.3%)    |
| - in total                                     | 42 (100%)         | 27 (100%)         | 6 (100%)                    |         | 75 (100%)     |
| TP53 exon 8 vs. non-exon<br>8 (18)             |                   |                   |                             | 0.83    |               |
| - exon 8                                       | 5 (11.9%)         | 1 (3.7%)          | 0                           |         | 6 (8%)        |
| - non-exon 8                                   | 12 (28.6%)        | 9 (33.3%)         | 2 (33.3%)                   |         | 23 (30.7%)    |
| - WT                                           | 16 (38.1%)        | 12 (44.5%)        | 2 (33.3%)                   |         | 30 (40%)      |
| - not done                                     | 9 (21.4%)         | 5 (18.5%)         | 2 (33.4%)                   |         | 16 (21.3%)    |
| - in total                                     | 42 (100%)         | 27 (100%)         | 6 (100%)                    |         | 75 (100%)     |

**Supplementary Table 2: Resistance mutations/amplifications of EGFR mutated patients**

| <b>TP53 Poeta et al. classification [1]</b>          |                            |                                        |                            |                                |                                                |
|------------------------------------------------------|----------------------------|----------------------------------------|----------------------------|--------------------------------|------------------------------------------------|
|                                                      | <b>EGFR T790M mutation</b> | <b>EGFR other resistance mutations</b> | <b>EGFR amplifications</b> | <b>Met gene amplifications</b> | <b>All resistance mutations/amplifications</b> |
| non-disruptive TP53 ( <i>n</i> = 13)                 | 4 (20%)                    | 0                                      | 0                          | 0                              | 4 (14.8%)                                      |
| disruptive TP53 ( <i>n</i> = 16)                     | 6 (30%)                    | 1 (33.3%)                              | 2 (66.7%)                  | 0                              | 9 (33.3%)                                      |
| TP53 WT ( <i>n</i> = 29)                             | 9 (45%)                    | 2 (66.7%)                              | 1 (33.3%)                  | 1 (100%)                       | 13 (48.2%)                                     |
| TP53 not done ( <i>n</i> = 16)                       | 1 (5%)                     | 0                                      | 0                          | 0                              | 1 (3.7%)                                       |
| ALL ( <i>n</i> = 74)                                 | 20 (100%)                  | 3 (100%)                               | 3 (100%)                   | 1 (100%)                       | 27 (100%)                                      |
|                                                      |                            | <b>Odds Ratio T790M</b>                |                            | <b><i>p</i>-value</b>          |                                                |
| non-disruptive vs. disruptive                        |                            | 0.74 [0.16, 3.50]                      |                            | 0.70                           |                                                |
| non-disruptive vs. TP53 WT                           |                            | 0.99 [0.24, 4.07]                      |                            | 0.99                           |                                                |
| disruptive vs. TP53 WT                               |                            | 1.33 [0.37, 4.80]                      |                            | 0.66                           |                                                |
| <b>TP53 structural/biophysical classification</b>    |                            |                                        |                            |                                |                                                |
|                                                      | <b>EGFR T790M mutation</b> | <b>EGFR other resistance mutations</b> | <b>EGFR amplifications</b> | <b>Met gene amplifications</b> | <b>All resistance mutations/amplifications</b> |
| non-pathogenic ( <i>n</i> = 7)                       | 2 (10%)                    | 0                                      | 0                          | 0                              | 2 (7.4%)                                       |
| pathogenic ( <i>n</i> = 22)                          | 8 (40%)                    | 1 (33.3%)                              | 2 (66.7%)                  | 0                              | 11 (40.7%)                                     |
| TP53 WT ( <i>n</i> = 29)                             | 9 (45%)                    | 2 (66.7%)                              | 1 (33.3%)                  | 1 (100%)                       | 13 (48.2%)                                     |
| TP53 not done ( <i>n</i> = 16)                       | 1 (5%)                     | 0                                      | 0                          | 0                              | 1 (3.7%)                                       |
| ALL ( <i>n</i> = 74)                                 | 20 (100%)                  | 3 (100%)                               | 3 (100%)                   | 1 (100%)                       | 27 (100%)                                      |
|                                                      |                            | <b>Odds ratio T790M</b>                |                            | <b><i>p</i>-value</b>          |                                                |
| non-pathogenic vs. pathogenic                        |                            | 0.70 [0.11, 4.48]                      |                            | 0.71                           |                                                |
| non-pathogenic vs. TP53 WT                           |                            | 0.89 [0.14, 5.48]                      |                            | 0.90                           |                                                |
| pathogenic vs. TP53 WT                               |                            | 1.27 [0.39, 4.10]                      |                            | 0.69                           |                                                |
| <b>TP53 exon 8 vs. non-exon 8 classification [3]</b> |                            |                                        |                            |                                |                                                |
|                                                      | <b>EGFR T790M mutation</b> | <b>EGFR other resistance mutations</b> | <b>EGFR amplifications</b> | <b>Met gene amplifications</b> | <b>All Resistance mutations/amplifications</b> |
| exon 8 ( <i>n</i> = 6)                               | 1 (5%)                     | 0                                      | 0                          | 0                              | 1 (3.7%)                                       |
| non-exon 8 ( <i>n</i> = 23)                          | 9 (45%)                    | 1 (33.3%)                              | 2 (66.7%)                  | 0                              | 12 (44.4%)                                     |
| TP53 WT ( <i>n</i> = 29)                             | 9 (45%)                    | 2 (66.7%)                              | 1 (33.3%)                  | 1 (100%)                       | 13 (48.2%)                                     |
| TP53 not done ( <i>n</i> = 16)                       | 1 (5%)                     | 0                                      | 0                          | 0                              | 1 (3.7%)                                       |
| ALL ( <i>n</i> = 74)                                 | 20 (100%)                  | 3 (100%)                               | 3 (100%)                   | 1 (100%)                       | 27 (100%)                                      |
|                                                      |                            | <b>Odds Ratio T790M</b>                |                            | <b><i>p</i>-value</b>          |                                                |
| exon 8 vs. non-exon 8                                |                            | 0.39 [0.04, 4.06]                      |                            | 0.43                           |                                                |
| exon 8 vs. TP53 WT                                   |                            | 0.56 [0.05, 5.70]                      |                            | 0.62                           |                                                |
| non-exon 8 vs. TP53 WT                               |                            | 1.43 [0.45, 4.51]                      |                            | 0.54                           |                                                |

**Supplementary Table 3: Results of the multivariate logistic regression**

| <b>TP53 Poeta et al. classification</b>           |           |               |                |                                 |
|---------------------------------------------------|-----------|---------------|----------------|---------------------------------|
| <b>Objective response</b>                         |           |               |                |                                 |
| <b>Variable</b>                                   | <b>OR</b> | <b>95% CI</b> | <b>p-value</b> | <b>Reference category</b>       |
| TP53 non-disruptive/disruptive mutation           | 0.03      | 0.00–0.56     | 0.019          | TP53 WT                         |
| EGFR uncommon mutation                            | 0.04      | 0.00–0.88     | 0.041          | EGFR common mutation            |
| ECOG 2                                            | 0.00      | 0.00–0.20     | 0.005          | ECOG 0 & 1                      |
| Initial CNS metastasis<br>• no                    | 0.03      | 0.00–0.95     | 0.047          | Initial CNS metastasis<br>• yes |
| <b>TP53 structural/biophysical classification</b> |           |               |                |                                 |
| <b>Objective response</b>                         |           |               |                |                                 |
| <b>Variable</b>                                   | <b>OR</b> | <b>95% CI</b> | <b>p-value</b> | <b>Reference category</b>       |
| TP53 pathogenic mutation                          | 0.12      | 0.02–0.75     | 0.024          | TP53 non-pathogenic             |
| EGFR uncommon mutation                            | 0.03      | 0.00–0.54     | 0.017          | EGFR common mutation            |
| ECOG 2                                            | 0.01      | 0.00–0.27     | 0.005          | ECOG 0 & 1                      |
| Initial CNS metastasis<br>• no                    | 0.04      | 0.00–0.82     | 0.037          | Initial CNS metastases<br>• yes |
| <b>TP53 Poeta et al. classification</b>           |           |               |                |                                 |
| <b>Progression free survival</b>                  |           |               |                |                                 |
| <b>Variable</b>                                   | <b>HR</b> | <b>95% CI</b> | <b>p-value</b> | <b>Reference category</b>       |
| TP53 nondisruptive/disruptive mutation            | 3.07      | 1.45–6.50     | 0.003          | TP53 WT                         |
| ECOG 2                                            | 4.23      | 1.56–11.50    | 0.005          | ECOG 0 & 1                      |
| <b>TP53 structural/biophysical classification</b> |           |               |                |                                 |
| <b>Progression free survival</b>                  |           |               |                |                                 |
| <b>Variable</b>                                   | <b>HR</b> | <b>95% CI</b> | <b>p-value</b> | <b>Reference category</b>       |
| TP53 pathogenic mutation                          | 6.19      | 2.80–13.70    | <0.001         | TP53 non-pathogenic             |
| ECOG 2                                            | 4.12      | 1.51–11.29    | 0.006          | ECOG 0 & 1                      |
| EGFR uncommon mutation                            | 3.19      | 1.21–8.43     | 0.019          | EGFR common status              |
| <b>TP53 Poeta et al. classification</b>           |           |               |                |                                 |
| <b>Overall survival</b>                           |           |               |                |                                 |
| <b>Variable</b>                                   | <b>HR</b> | <b>95% CI</b> | <b>p-value</b> | <b>Reference category</b>       |
| TP53 nondisruptive/disruptive mutation            | 4.08      | 1.87–8.88     | <0.001         | TP53 WT                         |
| ECOG 2                                            | 6.48      | 2.21–18.97    | 0.001          | ECOG 0 & 1                      |
| Initial CNS metastasis<br>• no                    | 0.36      | 0.15–0.84     | 0.019          | Initial CNS metastasis<br>• yes |
| <b>TP53 structural/biophysical classification</b> |           |               |                |                                 |
| <b>Overall survival</b>                           |           |               |                |                                 |
| <b>Variable</b>                                   | <b>HR</b> | <b>95% CI</b> | <b>p-value</b> | <b>Reference category</b>       |
| TP53 pathogenic mutation                          | 4.88      | 2.26–10.55    | <0.001         | TP53 non-pathogenic             |
| ECOG 2                                            | 5.93      | 2.04–17.23    | 0.001          | ECOG 0 & 1                      |
| Initial CNS metastasis<br>• no                    | 0.35      | 0.15–0.81     | 0.014          | Initial CNS metastasis<br>• yes |
